# Supplementary material
Source: publisher figshare collection journal article supplement (https://geolsoc.figshare.com/ndownloader/files/5425088)
Supplement: Supplementary file 1 [file 5425088]

Some references specific to the supplementary data are given here – see the research paper for the others cited

Ballantyne, C.K. 2002. Paraglacial geomorphology. *Quaternary Science Reviews*, **21**, 1935–2017.

Jarman, D. 2003*a*. Paraglacial landscape evolution – The significance of rock slope failure. *In:* Evans, D.J.A. (ed.) *The Quaternary of the Western Highland Boundary – Field Guide*. Quaternary Research Association, London, 50–68.

McDougall, D. 2013. Glaciation style and the geomorphological record: Evidence for Younger Dryas glaciers in the eastern Lake District, northwest England. *Quaternary Science Reviews*, **73**, 48–58.

Wilson, P. 2011. Re-interpretation of the ‘relict protalus rock glacier’ at Grasmoor End, northwest Lake District. *North West Geography*, **11**, 1–6.
